# Supplementary material
Source: PubMed Central journal article supplement (PMC6751692)
Supplement: ao9b01833_si_001.pdf [file ao9b01833_si_001.pdf]

## Supporting Information

### **Double-crosslinked GO interlayer framework as pervaporation hybrid membrane with high-performance**

Xin Zhang <sup>a</sup>, Ming-Xiao Zhang <sup>a</sup>, Hao Ding <sup>a</sup>, Hu Yang <sup>a</sup>, Xiao-Hua Ma<sup>\*,a</sup>, Xin-Ru Xu <sup>a</sup>, Zhen-Liang Xu <sup>a</sup>, Chuyang Y. Tang <sup>b,c,d</sup>

<sup>a</sup> *Shanghai Key Laboratory of Multiphase Materials Chemical Engineering, Membrane Science and Engineering R&D Lab, Chemical Engineering Research Center, School of Chemical Engineering, East China University of Science and Technology, 130 Meilong Road, 200237, Shanghai, China*

<sup>b</sup> *UNESCO Centre for Membrane Science and Technology, School of Chemical Engineering, University of New South Wales, Sydney, New South Wales 2052, Australia*

<sup>c</sup> *UNSW Water Research Centre, School of Civil and Environmental Engineering, University of New South Wales, Sydney, New South Wales 2052, Australia*

<sup>d</sup> *Department of Civil Engineering, the University of Hong Kong, Pokfulam Road, Hong Kong S.A.R., China*

Corresponding Author: \* (Xiao-Hua Ma) Email: xiaohuama@ecust.edu.cn

Tel.: +86 21 64253670; fax: +86 21 64252989.

### Table of Contents

|           |   |
|-----------|---|
| Table S1  | 2 |
| Figure S1 | 3 |
| Figure S2 | 4 |

Table S1 the location and area ratio of absorption peaks in FT-IR spectra.

| Item      | Chemical bonds (wavenumbers $\text{cm}^{-1}$ ) |      |      | Peak area |      | Area ratio<br>(C=O/N-H) |
|-----------|------------------------------------------------|------|------|-----------|------|-------------------------|
|           | O-H; N-H                                       | C=O  | N-H  | C=O       | N-H  |                         |
| CS        | 3366                                           | 1652 | 1586 | 3.4       | 3.3  | 1.1                     |
| CS-GO     | 3366                                           | 1644 | 1563 | 6.4       | 9.6  | 0.7                     |
| CS-GO/TMC | 3366                                           | 1640 | 1558 | 11.0      | 16.9 | 0.7                     |

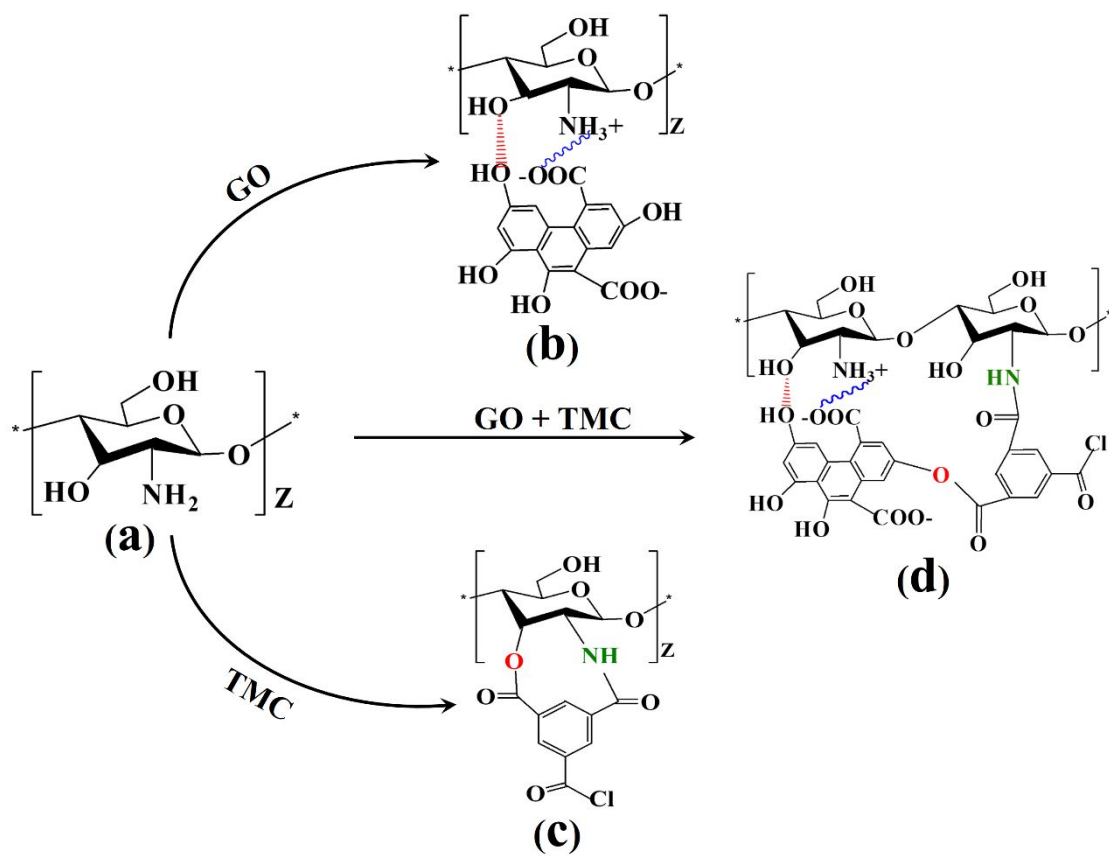

Figure S1 the crosslinking schematic of (a) CS, (b) CS-GO, (c) CS/TMC, (d) CS-GO/TMC crosslinking membranes. The CS, GO, and TMC concentration were 1.0 wt%, 0.1 wt% and 0.5 wt%, respectively.

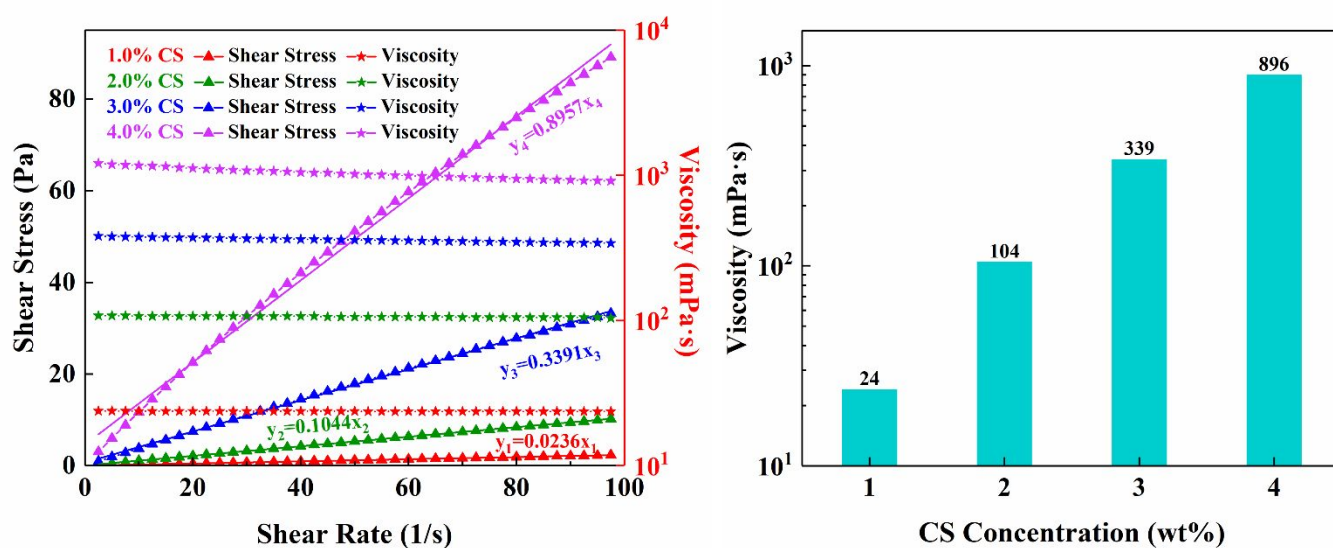

Figure S2 The viscosity of CS with different concentration (1.0 wt% - 4.0 wt%). The testing temperature is 25 °C.

From the Figure S2 (left), CS solution exhibit Newtonian flux performance when the concentration of CS is less than 4.0 wt%. As a result, the slope of shear stress vs. shear rate could be considered as the viscosity of CS solution which were presented in Figure S2 (right).
